# Supplementary material for: Potentiation of P2RX7 as a host-directed strategy for control of mycobacterial infection
Source: PubMed Central journal article supplement (PMC6351102; doi:10.7554/elife.39123), 2019-01-29
Supplement: elife-39123-supp1.pdf [file elife-39123-supp1.pdf]

| Drug Name                      | Approved Use / Target                | Other targets                                                                                                                                                              | Structure | FMLA structure | Molecular Weight | CAS Number | Therapeutic Class      | Therapeutic Effect |
|--------------------------------|--------------------------------------|----------------------------------------------------------------------------------------------------------------------------------------------------------------------------|-----------|----------------|------------------|------------|------------------------|--------------------|
| Desipramine hydrochloride*     | Norepinephrine reuptake inhibitor    | Inhibitor of acid sphingomyelinase (1)                                                                                                                                     |           | C18H23ClN2     | 302.85           | 58-28-6    | Central Nervous System | Antidepressant     |
| Chlorpromazine hydrochloride*  | Dopamine antagonist                  | Inhibitor of acid sphingomyelinase (1)                                                                                                                                     |           | C17H20Cl2N2S   | 355.33           | 69-09-0    | Cardiovascular         | Antiemetic         |
| Trimeprazine tartrate          | Antipruritic                         | increases insulin receptor substrate 2 in islet cells (2)                                                                                                                  |           | C40H50N4O6S2   | 747.00           | 4330-99-8  | Allergology            | Antihistaminic     |
| Zucloperthixol dihydrochloride | Dopamine and adrenoceptor antagonist | induces neutropenia (3)                                                                                                                                                    |           | C22H27Cl3N2OS  | 473.90           | 633-59-0   | Central Nervous System | Antipsychotic      |
| Metixene hydrochloride         | Cholinesterase inhibitor             | cytotoxic against oral squamous cell carcinoma (4)                                                                                                                         |           | C20H24ClNS     | 345.94           | 1553-34-0  | Central Nervous System | Antiparkinsonian   |
| Methylhydantoin-5-(L)          | Anticonvulsant                       | inhibits enteroviral replication (5)                                                                                                                                       |           | C4H6N2O2       | 114.10           | 40856-73-3 | Central Nervous System | Anticonvulsant     |
| Equilin                        | Binds estrogen receptor beta         |                                                                                                                                                                            |           | C18H20O2       | 268.36           | 474-86-2   | Endocrinology          |                    |
| Clemastine fumarate            | Histamine H1 Receptor Antagonist     | remyelinate nerves (6) (7), anti-inflammatory (8), multiple sclerosis treatment (9) inhibits HERG K+ channel (10), potentiates P2X7 receptor (11) increases apoptosis (12) |           | C25H30ClNO5    | 459.97           | 14976-57-9 | Allergology            | Antiemetic         |
| Prothionamide                  | Thioamide antimycobacterial pro-drug |                                                                                                                                                                            |           | C9H12N2S       | 180.27           | 14222-60-7 | Infectiology           | Antibacterial      |
| Paromomycin sulfate            | aminoglycoside antibiotic            |                                                                                                                                                                            |           | C23H47N5O18S   | 713.72           | 1263-89-4  | Metabolism             | Antiamebic         |
| Spiramycin                     | macrolide antibiotic                 |                                                                                                                                                                            |           | C43H73N2O14R   | 843.07           | 8025-81-8  | Metabolism             | Antibacterial      |
| Enoxacin                       | fluoroquinolone antibiotic           |                                                                                                                                                                            |           | C15H17FN4O3    | 320.33           | 84294-96-2 | Infectiology           | Antibacterial      |
| Sulfamethazine sodium salt     | sulfonamide antibacterial            |                                                                                                                                                                            |           | C12H13N4NaO2S  | 300.32           | 1981-58-4  | Metabolism             | Antibacterial      |

#### Citations

- 1) Roca, Francisco J and Lalita Ramakrishnan. "TNF dually mediates resistance and susceptibility to mycobacteria via mitochondrial reactive oxygen species" *Cell* vol. 153,3 (2013): 521-34.
- 2) Kuznetsova, Alexandra et al. "Trimeprazine increases IRS2 in human islets and promotes pancreatic  $\beta$  cell growth and function in mice" *JCI insight* vol. 1,3 (2016): e80749.
- 3) Hirschberg, Boaz, et al. "Zucloperthixol-Associated Neutropenia and Thrombocytopenia." *Annals of Pharmacotherapy*, vol. 34, no. 6, June 2000, pp. 740–742, doi:10.1345/aph.18468.
- 4) Kellen Cristine Tjoe, Denise Tostes Oliveira & Julie Gavard "Luteolin Impacts on the DNA Damage Pathway in Oral Squamous Cell Carcinoma", *Nutrition and Cancer* vol. 68,5, (2016): 838-847, DOI: 10.1080/01635581.2016.1180411
- 5) Yvan Verlinden, Andrea Cuconati, Eckard Wimmer, Bart Rombaut, "The antiviral compound 5-(3,4-dichlorophenyl) methylhydantoin inhibits the post-synthetic cleavages and the assembly of poliovirus in a cell-free system" *Antiviral Research* Vol 48,1(2000) 61-69
- 6) Liu, Jia et al. "Clemastine Enhances Myelination in the Prefrontal Cortex and Rescues Behavioral Changes in Socially Isolated Mice" *Journal of neuroscience : the official journal of the Society for Neuroscience* vol. 36,3 (2016): 957-62.
- 7) Bruce A C Cree, Jianqin Niu, Kimberly K Hoi, Chao Zhao, Scott D Caganap, Roland G Henry, Dang Q Dao, Daniel R Zollinger, Feng Mei, Yun-An A Shen, Robin J M Franklin, Erik M Ullian, Lan Xiao, Jonah R Chan, Stephen P J Fancy; "Clemastine rescues myelination defects and promotes functional recovery in hypoxic brain injury", *Brain*, Vol. 141, 1, (2018) 85–98
- 8) Johansen, Pål et al. "Clemastine causes immune suppression through inhibition of extracellular signal-regulated kinase–dependent proinflammatory cytokines" *Journal of Allergy and Clinical Immunology* (2011) Vol.128 , 6 , 1286 - 1294
- 9) Green, Ari J et al. "Clemastine fumarate as a remyelinating therapy for multiple sclerosis (ReBUILD): a randomised, controlled, double-blind, crossover trial" *The Lancet* Vol. 390 , 10111 (2017) 2481 - 2489
- 10) Ridley, John M. et al. "Clemastine, a conventional antihistamine, is a high potency inhibitor of the HERG K+ channel" *Journal of Molecular and Cellular Cardiology* , Vol. 40,1 (2006) 107 - 118
- 11) Nörenberg, Wolfgang et al. "Clemastine potentiates the human P2X7 receptor by sensitizing it to lower ATP concentrations" *Journal of biological chemistry* vol. 286,13 (2011): 11067-81.
- 12) Döbbling, U. , Waecckerle-Men, Y. , Zabel, F. , Graf, N. , Kündig, T. M. and Johansen, P. "The antihistamines clemastine and desloratadine inhibit STAT3 and c-Myc activities and induce apoptosis in cutaneous T-cell lymphoma cell lines". *Exp Dermatol*, 22: (2013) 119-124

**Supplementary Table 1: Summary of identified compounds.** Compounds with blue background are host directed and compounds in red are known anti-infectives. Asterisk (\*) represents compounds with previously identified host-directed anti-mycobacterial activities.
