# Supplementary material for: Potentiation of P2RX7 as a host-directed strategy for control of mycobacterial infection
Source: PubMed Central journal article supplement (PMC6351102; doi:10.7554/elife.39123), 2019-01-29
Supplement: elife-39123-supp2.pdf [file elife-39123-supp2.pdf]

# Supplementary Table 2

| UNTRANSFORMED DATA                      |                 |                       |              |                  |                  | TRANSFORMED DATA                      |                 |                     |              |                  |                  |
|-----------------------------------------|-----------------|-----------------------|--------------|------------------|------------------|---------------------------------------|-----------------|---------------------|--------------|------------------|------------------|
| <b>Figure 2A</b>                        |                 |                       |              |                  |                  | <b>Figure 2A</b>                      |                 |                     |              |                  |                  |
| Unpaired t test with Welch's correction |                 |                       |              |                  |                  | Unpaired t test                       |                 |                     |              |                  |                  |
| P value                                 |                 | 0.0016                |              |                  |                  | P value                               |                 | 0.0001              |              |                  |                  |
| P value summary                         |                 | **                    |              |                  |                  | P value summary                       |                 | ***                 |              |                  |                  |
| Significantly different (P < 0.05)?     |                 | Yes                   |              |                  |                  | Significantly different (P < 0.05)?   |                 | Yes                 |              |                  |                  |
| One- or two-tailed P value?             |                 | Two-tailed            |              |                  |                  | One- or two-tailed P value?           |                 | Two-tailed          |              |                  |                  |
| Welch-corrected t, df                   |                 | t=3.343 df=49.38      |              |                  |                  | t, df                                 |                 | t=3.997 df=84       |              |                  |                  |
| <b>Figure 2C</b>                        |                 |                       |              |                  |                  | <b>Figure 2C</b>                      |                 |                     |              |                  |                  |
| Ordinary One-Way ANOVA                  |                 |                       |              |                  |                  | Ordinary One-Way ANOVA                |                 |                     |              |                  |                  |
| Tukey's multiple comparisons test       | Mean Diff.      | 95.00% CI of diff.    | Significant? | Summary          | Adjusted P Value | Tukey's multiple comparisons test     | Mean Diff.      | 95.00% CI of diff.  | Significant? | Summary          | Adjusted P Value |
| 0.5% DMSO vs. 1uM CLEM                  | 13015140        | -514848 to 26545129   | No           | ns               | 0.0637           | 0.5% DMSO vs. 1uM CLEM                | 0.2452          | -0.02369 to 0.514   | No           | ns               | 0.0864           |
| 0.5% DMSO vs. 5uM CLEM                  | 16217914        | 2103630 to 30323198   | Yes          | *                | 0.0179           | 0.5% DMSO vs. 5uM CLEM                | 0.346           | 0.06655 to 0.6264   | Yes          | **               | 0.0095           |
| 0.5% DMSO vs. 10uM CLEM                 | 21799685        | 7448965 to 36150405   | Yes          | ***              | 0.0009           | 0.5% DMSO vs. 10uM CLEM               | 0.5622          | 0.2718 to 0.8526    | Yes          | ***              | <0.0001          |
| 1uM CLEM vs. 5uM CLEM                   | 3202774         | -10911510 to 17317057 | No           | ns               | 0.9325           | 1uM CLEM vs. 5uM CLEM                 | 0.1008          | -0.1797 to 0.3813   | No           | ns               | 0.7799           |
| 1uM CLEM vs. 10uM CLEM                  | 8784545         | -5566176 to 23135265  | No           | ns               | 0.3789           | 1uM CLEM vs. 10uM CLEM                | 0.317           | 0.02665 to 0.6075   | Yes          | *                | 0.027            |
| 5uM CLEM vs. 10uM CLEM                  | 5581771         | -9321101 to 20484642  | No           | ns               | 0.7578           | 5uM CLEM vs. 10uM CLEM                | 0.2162          | -0.08494 to 0.5174  | No           | ns               | 0.2415           |
| <b>Figure 2E</b>                        |                 |                       |              |                  |                  | <b>Figure 2E</b>                      |                 |                     |              |                  |                  |
| Kruskal-Wallis test                     |                 |                       |              |                  |                  | Kruskal-Wallis test                   |                 |                     |              |                  |                  |
| Dunn's multiple comparisons test        | Mean rank diff. | Significant?          | Summary      | Adjusted P Value |                  | Dunn's multiple comparisons test      | Mean rank diff. | Significant?        | Summary      | Adjusted P Value |                  |
| DMSO wt/het vs. 5uM CLEM wt/het         | 24.4            | Yes                   | *            | 0.0352           | A-B              | DMSO wt/het vs. 5uM CLEM wt/het       | 24.4            | Yes                 | *            | 0.0352           | A-B              |
| DMSO MUT irf8 vs. 5uM CLEM MUT irf8     | -2.272          | No                    | ns           | >0.9999          | C-D              | DMSO MUT irf8 vs. 5uM CLEM MUT irf8   | -2.272          | No                  | ns           | >0.9999          | C-D              |
| <b>Figure 2G</b>                        |                 |                       |              |                  |                  | <b>Figure 2G</b>                      |                 |                     |              |                  |                  |
| Unpaired t test                         |                 |                       |              |                  |                  | N/A                                   |                 |                     |              |                  |                  |
| P value                                 |                 | 0.0006                |              |                  |                  |                                       |                 |                     |              |                  |                  |
| P value summary                         |                 | ***                   |              |                  |                  |                                       |                 |                     |              |                  |                  |
| Significantly different (P < 0.05)?     |                 | Yes                   |              |                  |                  |                                       |                 |                     |              |                  |                  |
| One- or two-tailed P value?             |                 | Two-tailed            |              |                  |                  |                                       |                 |                     |              |                  |                  |
| t, df                                   |                 | t=3.97 df=22          |              |                  |                  |                                       |                 |                     |              |                  |                  |
| <b>Figure 3C</b>                        |                 |                       |              |                  |                  | <b>Figure 3C</b>                      |                 |                     |              |                  |                  |
| Kruskal-Wallis test                     |                 |                       |              |                  |                  | Kruskal-Wallis test                   |                 |                     |              |                  |                  |
| Dunn's multiple comparisons test        | Mean rank diff. | Significant?          | Summary      | Adjusted P Value |                  | Dunn's multiple comparisons test      | Mean rank diff. | Significant?        | Summary      | Adjusted P Value |                  |
| WT DMSO vs. WT CLEM                     | -35.05          | Yes                   | ****         | <0.0001          | A-B              | WT DMSO vs. WT CLEM                   | -35.05          | Yes                 | ****         | <0.0001          | A-B              |
| WT DMSO vs. P2RX7*xt26 DMSO             | -8.75           | No                    | ns           | >0.9999          | A-C              | WT DMSO vs. P2RX7*xt26 DMSO           | -8.75           | No                  | ns           | >0.9999          | A-C              |
| WT DMSO vs. P2RX7*xt26 DMSO             | -14.4           | No                    | ns           | 0.7007           | A-D              | WT DMSO vs. P2RX7*xt26 DMSO           | -14.4           | No                  | ns           | 0.7007           | A-D              |
| WT CLEM vs. P2RX7*xt26 DMSO             | 26.3            | Yes                   | ***          | 0.0004           | B-C              | WT CLEM vs. P2RX7*xt26 DMSO           | 26.3            | Yes                 | ***          | 0.0004           | B-C              |
| WT CLEM vs. P2RX7*xt26 DMSO             | 20.65           | Yes                   | *            | 0.0461           | B-D              | WT CLEM vs. P2RX7*xt26 DMSO           | 20.65           | Yes                 | *            | 0.0461           | B-D              |
| P2RX7*xt26 DMSO vs. P2RX7*xt26 DMSO     | -5.654          | No                    | ns           | >0.9999          | C-D              | P2RX7*xt26 DMSO vs. P2RX7*xt26 DMSO   | -5.654          | No                  | ns           | >0.9999          | C-D              |
| <b>Figure 4A</b>                        |                 |                       |              |                  |                  | <b>Figure 4A</b>                      |                 |                     |              |                  |                  |
| Kruskal-Wallis test                     |                 |                       |              |                  |                  | Ordinary One-Way ANOVA                |                 |                     |              |                  |                  |
| Dunn's multiple comparisons test        | Mean rank diff. | Significant?          | Summary      | Adjusted P Value |                  | Tukey's multiple comparisons test     | Mean Diff.      | 95.00% CI of diff.  | Significant? | Summary          | Adjusted P Value |
| WT DMSO vs. WT CLEM                     | 36.46           | Yes                   | ****         | <0.0001          | A-B              | WT DMSO vs. WT CLEM                   | 0.6204          | 0.3006 to 0.9402    | Yes          | ****             | <0.0001          |
| WT DMSO vs. p2x7 mutant DMSO            | 16              | No                    | ns           | 0.7862           | A-C              | WT DMSO vs. p2x7 mutant DMSO          | 0.3088          | -0.1204 to 0.7379   | No           | ns               | 0.2451           |
| WT DMSO vs. p2x7 mutant CLEM            | 21.38           | No                    | ns           | 0.4201           | A-C              | WT DMSO vs. p2x7 mutant CLEM          | 0.382           | -0.09595 to 0.86    | No           | ns               | 0.1652           |
| WT CLEM vs. p2x7 mutant DMSO            | -20.46          | No                    | ns           | 0.3208           | B-D              | WT CLEM vs. p2x7 mutant DMSO          | -0.3117         | -0.7408 to 0.1174   | No           | ns               | 0.2375           |
| WT CLEM vs. p2x7 mutant CLEM            | -15.08          | No                    | ns           | >0.9999          | B-D              | WT CLEM vs. p2x7 mutant CLEM          | -0.2384         | -0.7164 to 0.2396   | No           | ns               | 0.5662           |
| p2x7 mutant DMSO vs. p2x7 mutant CLEM   | 5.383           | No                    | ns           | >0.9999          | C-D              | p2x7 mutant DMSO vs. p2x7 mutant CLEM | 0.07327         | -0.4838 to 0.6303   | No           | ns               | 0.9862           |
| <b>Figure 5A</b>                        |                 |                       |              |                  |                  | <b>Figure 5A</b>                      |                 |                     |              |                  |                  |
| Kruskal-Wallis test                     |                 |                       |              |                  |                  | Ordinary One-Way ANOVA                |                 |                     |              |                  |                  |
| Dunn's multiple comparisons test        | Mean rank diff. | Significant?          | Summary      | Adjusted P Value |                  | Tukey's multiple comparisons test     | Mean Diff.      | 95.00% CI of diff.  | Significant? | Summary          | Adjusted P Value |
| Mm:WT DMSO vs. Mm:WT CLEM               | 29.12           | Yes                   | *            | 0.043            | A-B              | Mm:WT DMSO vs. Mm:WT CLEM             | 0.3101          | 0.02344 to 0.5967   | Yes          | *                | 0.0284           |
| Mm:WT DMSO vs. Mm:ΔRD1 DMSO             | 36.31           | Yes                   | **           | 0.0044           | A-C              | Mm:WT DMSO vs. Mm:ΔRD1 DMSO           | 0.3712          | 0.08659 to 0.6558   | Yes          | **               | 0.0049           |
| Mm:WT DMSO vs. Mm:ΔRD1 CLEM             | 36.49           | Yes                   | **           | 0.014            | A-C              | Mm:WT DMSO vs. Mm:ΔRD1 CLEM           | 0.3655          | 0.1034 to 0.6276    | Yes          | **               | 0.0022           |
| Mm:WT CLEM vs. Mm:ΔRD1 DMSO             | 7.195           | No                    | ns           | >0.9999          | B-C              | Mm:WT CLEM vs. Mm:ΔRD1 DMSO           | 0.06113         | -0.2213 to 0.3436   | No           | ns               | 0.943            |
| Mm:WT CLEM vs. Mm:ΔRD1 CLEM             | 7.373           | No                    | ns           | >0.9999          | B-D              | Mm:WT CLEM vs. Mm:ΔRD1 CLEM           | 0.05543         | -0.2043 to 0.3151   | No           | ns               | 0.9452           |
| Mm:ΔRD1 DMSO vs. Mm:ΔRD1 CLEM           | 0.1776          | No                    | ns           | >0.9999          | C-D              | Mm:ΔRD1 DMSO vs. Mm:ΔRD1 CLEM         | -0.005705       | -0.2632 to 0.2518   | No           | ns               | >0.9999          |
| <b>Figure 5B</b>                        |                 |                       |              |                  |                  | <b>Figure 5B</b>                      |                 |                     |              |                  |                  |
| Kruskal-Wallis test                     |                 |                       |              |                  |                  | Ordinary One-Way ANOVA                |                 |                     |              |                  |                  |
| Dunn's multiple comparisons test        | Mean rank diff. | Significant?          | Summary      | Adjusted P Value |                  | Tukey's multiple comparisons test     | Mean Diff.      | 95.00% CI of diff.  | Significant? | Summary          | Adjusted P Value |
| DMSO WT/HET vs. CLEM WT/HET             | 21.52           | Yes                   | *            | 0.0285           | A-B              | DMSO WT/HET vs. CLEM WT/HET           | 0.241           | 0.03425 to 0.4477   | Yes          | *                | 0.0154           |
| DMSO WT/HET vs. DMSO ASC MUTANT         | -16.56          | No                    | ns           | 0.3995           | A-C              | DMSO WT/HET vs. DMSO ASC MUTANT       | -0.152          | -0.3969 to 0.09285  | No           | ns               | 0.3723           |
| DMSO WT/HET vs. CLEM ASC MUTANT         | -12.91          | No                    | ns           | >0.9999          | A-D              | DMSO WT/HET vs. CLEM ASC MUTANT       | -0.1423         | -0.4329 to 0.1483   | No           | ns               | 0.5798           |
| CLEM WT/HET vs. DMSO ASC MUTANT         | -38.08          | Yes                   | ***          | 0.0001           | B-C              | CLEM WT/HET vs. DMSO ASC MUTANT       | -0.393          | -0.6358 to -0.1503  | Yes          | ***              | 0.0003           |
| CLEM WT/HET vs. CLEM ASC MUTANT         | -34.43          | Yes                   | **           | 0.0073           | B-D              | CLEM WT/HET vs. CLEM ASC MUTANT       | -0.3833         | -0.6721 to -0.09447 | Yes          | **               | 0.0042           |
| DMSO ASC MUTANT vs. CLEM ASC MUTANT     | 3.649           | No                    | ns           | >0.9999          | C-D              | DMSO ASC MUTANT vs. CLEM ASC MUTANT   | 0.009765        | -0.3075 to 0.327    | No           | ns               | 0.9998           |
| <b>Figure 6B</b>                        |                 |                       |              |                  |                  | <b>Figure 6B</b>                      |                 |                     |              |                  |                  |

# Supplementary Table 2

| *Friedman test* ANOVA                 |                |              |         |                  | N/A |  |  |  |  |
|---------------------------------------|----------------|--------------|---------|------------------|-----|--|--|--|--|
| Dunn's multiple comparisons test      | Rank sum diff. | Significant? | Summary | Adjusted P Value |     |  |  |  |  |
| WT DMSO vs. WT CLEM                   | 16             | Yes          | **      | 0.0021           | A-B |  |  |  |  |
| WT DMSO vs. P2X7 mutant DMSO          | 6              | No           | ns      | >0.9999          | A-C |  |  |  |  |
| WT DMSO vs. P2X7 mutant CLEM          | 10             | No           | ns      | 0.1521           | A-D |  |  |  |  |
| WT CLEM vs. P2X7 mutant DMSO          | -10            | No           | ns      | 0.1521           | B-C |  |  |  |  |
| WT CLEM vs. P2X7 mutant CLEM          | -6             | No           | ns      | >0.9999          | B-D |  |  |  |  |
| P2X7 mutant DMSO vs. P2X7 mutant CLEM | 4              | No           | ns      | >0.9999          | C-D |  |  |  |  |

  

| Figure 6C                           |              |  |  |                                         | Figure 6C    |  |  |     |  |
|-------------------------------------|--------------|--|--|-----------------------------------------|--------------|--|--|-----|--|
| Paired t test                       |              |  |  | Unpaired t test with Welch's correction |              |  |  | N/A |  |
| P value                             | 0.0253       |  |  | P value                                 | 0.0253       |  |  |     |  |
| P value summary                     | *            |  |  | P value summary                         | *            |  |  |     |  |
| Significantly different (P < 0.05)? | Yes          |  |  | Significantly different (P < 0.05)?     | Yes          |  |  |     |  |
| One- or two-tailed P value?         | Two-tailed   |  |  | One- or two-tailed P value?             | Two-tailed   |  |  |     |  |
| t, df                               | t=4.157 df=3 |  |  | Welch-corrected t, df                   | t=4.157 df=3 |  |  |     |  |
| Number of pairs                     | 4            |  |  |                                         |              |  |  |     |  |

  

| Figure 6D                           |                                    |  |  |                                         | Figure 6D        |  |  |                                         |                  |
|-------------------------------------|------------------------------------|--|--|-----------------------------------------|------------------|--|--|-----------------------------------------|------------------|
| Paired t test                       | pairing values: r=0.6966, p=0.0028 |  |  | Unpaired t test with Welch's correction |                  |  |  | Unpaired t test with Welch's correction |                  |
| P value                             | <0.0001                            |  |  | P value                                 | <0.0001          |  |  | P value                                 | <0.0001          |
| P value summary                     | ****                               |  |  | P value summary                         | ****             |  |  | P value summary                         | ****             |
| Significantly different (P < 0.05)? | Yes                                |  |  | Significantly different (P < 0.05)?     | Yes              |  |  | Significantly different (P < 0.05)?     | Yes              |
| One- or two-tailed P value?         | Two-tailed                         |  |  | One- or two-tailed P value?             | Two-tailed       |  |  | One- or two-tailed P value?             | Two-tailed       |
| t, df                               | t=7.625 df=13                      |  |  | Welch-corrected t, df                   | t=6.227 df=15.36 |  |  | Welch-corrected t, df                   | t=6.389 df=20.23 |
| Number of pairs                     | 14                                 |  |  |                                         |                  |  |  |                                         |                  |

  

| Figure 6E                               |                                                                                                                                                                                           |  |  |                                     | Figure 6E                                                                                                                                                                                 |  |  |                                     |              |
|-----------------------------------------|-------------------------------------------------------------------------------------------------------------------------------------------------------------------------------------------|--|--|-------------------------------------|-------------------------------------------------------------------------------------------------------------------------------------------------------------------------------------------|--|--|-------------------------------------|--------------|
| Unpaired t test with Welch's correction | *note: one outlier was excluded. Only 2 colonies grew on the least diluted plate despite having high bacterial values by fluorescence. It was >2 SD Log(0.8) away from the mean Log(5.23) |  |  | Unpaired t test                     | *note: one outlier was excluded. Only 2 colonies grew on the least diluted plate despite having high bacterial values by fluorescence. It was >2 SD Log(0.8) away from the mean Log(5.23) |  |  | Unpaired t test                     |              |
| P value                                 | 0.2392                                                                                                                                                                                    |  |  | P value                             | 0.0037                                                                                                                                                                                    |  |  | P value                             | 0.0037       |
| P value summary                         | ns                                                                                                                                                                                        |  |  | P value summary                     | **                                                                                                                                                                                        |  |  | P value summary                     | **           |
| Significantly different (P < 0.05)?     | No                                                                                                                                                                                        |  |  | Significantly different (P < 0.05)? | Yes                                                                                                                                                                                       |  |  | Significantly different (P < 0.05)? | Yes          |
| One- or two-tailed P value?             | Two-tailed                                                                                                                                                                                |  |  | One- or two-tailed P value?         | Two-tailed                                                                                                                                                                                |  |  | One- or two-tailed P value?         | Two-tailed   |
| Welch-corrected t, df                   | t=1.381 df=4.01                                                                                                                                                                           |  |  | t, df                               | t=3.877 df=9                                                                                                                                                                              |  |  | t, df                               | t=3.877 df=9 |

  

| Figure 6E without outlier removed       |                  |  |  |                                     | Figure 6E without outlier removed |  |  |                                     |               |
|-----------------------------------------|------------------|--|--|-------------------------------------|-----------------------------------|--|--|-------------------------------------|---------------|
| Unpaired t test with Welch's correction |                  |  |  | Unpaired t test                     |                                   |  |  | Unpaired t test                     |               |
| P value                                 | 0.2366           |  |  | P value                             | 0.1397                            |  |  | P value                             | 0.1397        |
| P value summary                         | ns               |  |  | P value summary                     | ns                                |  |  | P value summary                     | ns            |
| Significantly different (P < 0.05)?     | No               |  |  | Significantly different (P < 0.05)? | No                                |  |  | Significantly different (P < 0.05)? | No            |
| One- or two-tailed P value?             | Two-tailed       |  |  | One- or two-tailed P value?         | Two-tailed                        |  |  | One- or two-tailed P value?         | Two-tailed    |
| Welch-corrected t, df                   | t=1.344 df=5.018 |  |  | t, df                               | t=1.605 df=10                     |  |  | t, df                               | t=1.605 df=10 |

  

| Figure 6F                                       |                 |              |         |                     | Figure 6F       |              |         |                     |                 |
|-------------------------------------------------|-----------------|--------------|---------|---------------------|-----------------|--------------|---------|---------------------|-----------------|
| Kruskal-Wallis test                             |                 |              |         | Kruskal-Wallis test |                 |              |         | Kruskal-Wallis test |                 |
| Dunn's multiple comparisons test                | Mean rank diff. | Significant? | Summary | Adjusted P Value    | Mean rank diff. | Significant? | Summary | Adjusted P Value    | Mean rank diff. |
| AB DMSO (0.5%) vs. AB CLEM (5uM)                | 21.76           | Yes          | *       | 0.0111              | A-B             | 21.76        | Yes     | *                   | 0.0111          |
| AB DMSO (0.5%) vs. AB MOX (2ug/mL)              | 28.56           | Yes          | ***     | 0.0003              | A-C             | 28.56        | Yes     | ***                 | 0.0003          |
| AB DMSO (0.5%) vs. AB MOX (2ug/mL)+ CLEM (5uM)  | 49.67           | Yes          | ****    | <0.0001             | A-D             | 49.67        | Yes     | ****                | <0.0001         |
| AB CLEM (5uM) vs. AB MOX (2ug/mL)               | 6.801           | No           | ns      | >0.9999             | B-C             | 6.801        | No      | ns                  | >0.9999         |
| AB CLEM (5uM) vs. AB MOX (2ug/mL)+ CLEM (5uM)   | 27.92           | Yes          | ***     | 0.0002              | B-D             | 27.92        | Yes     | ***                 | 0.0002          |
| AB MOX (2ug/mL) vs. AB MOX (2ug/mL)+ CLEM (5uM) | 21.11           | Yes          | *       | 0.0131              | C-D             | 21.11        | Yes     | *                   | 0.0131          |

**Supplementary Table 2: Summary of p values and statistical tests for Figures 1-6.**

Statistics performed on transformed data are in yellow and untransformed is in gray. The table is organized by figure number, in chronological order. Statistical tests are listed and transformation equation provided, where applicable. When a paired t-test is performed on paired data, the results of the unpaired t-test are also given. When both paired and unpaired are potentially appropriate (in the case of paired data with ineffective pairing), both test results are given. Statistical test results in *italics* denote tests not presented within the figures.
