# Supplementary material for: Potentiation of P2RX7 as a host-directed strategy for control of mycobacterial infection
Source: PubMed Central journal article supplement (PMC6351102; doi:10.7554/elife.39123), 2019-01-29
Supplement: elife-39123-supp3.pdf [file elife-39123-supp3.pdf]

**Supplementary Table 3: Summary of p values and statistical tests for Supplementary Figures 1-9.** Statistics performed on transformed data are in orange and untransformed is in light blue. The table is organized by figure number, in chronological order. Statistical tests are listed and transformation equation provided, where applicable. When a paired t-test is performed on paired data, the results of the unpaired t-test are also given. When both paired and unpaired are potentially appropriate (in the case of paired data with ineffective pairing), both test results are given. Statistical test results in *italics* denote tests not presented within the figure.



Supplementary Table 3

|                       |         |                    |     |      |         |        |     |  |  |  |  |  |  |
|-----------------------|---------|--------------------|-----|------|---------|--------|-----|--|--|--|--|--|--|
| DMSO WT vs. CLEM WT   | 0.5875  | 0.4064 to 0.7686   | Yes | **** | <0.0001 | A-B    |     |  |  |  |  |  |  |
| DMSO WT vs. DMSO MUT  | 0.3203  | 0.04111 to 0.5995  | Yes | *    |         | 0.0238 | A-C |  |  |  |  |  |  |
| DMSO WT vs. CLEM MUT  | 0.4017  | 0.07144 to 0.732   | Yes | *    |         | 0.0168 | A-D |  |  |  |  |  |  |
| CLEM WT vs. DMSO MUT  | -0.2672 | -0.5597 to 0.02539 | No  | ns   |         | 0.0769 | B-C |  |  |  |  |  |  |
| CLEM WT vs. CLEM MUT  | -0.1857 | -0.4811 to 0.1096  | No  | ns   |         | 0.2855 | B-D |  |  |  |  |  |  |
| DMSO MUT vs. CLEM MUT | 0.08142 | -0.1797 to 0.3425  | No  | ns   |         | 0.7854 | C-D |  |  |  |  |  |  |

|                                     |                                          |  |  |                                     |               |  |     |
|-------------------------------------|------------------------------------------|--|--|-------------------------------------|---------------|--|-----|
| <b>Supplementary Figure 4B</b>      |                                          |  |  | <b>Supplementary Figure 4B</b>      |               |  |     |
| Paired t test                       | pairing values:<br>r=0.7341,<br>p=0.0033 |  |  | Unpaired t test                     |               |  | N/A |
| P value                             | 0.0013                                   |  |  | P value                             | 0.0157        |  |     |
| P value summary                     | **                                       |  |  | P value summary                     | *             |  |     |
| Significantly different (P < 0.05)? | Yes                                      |  |  | Significantly different (P < 0.05)? | Yes           |  |     |
| One- or two-tailed P value?         | Two-tailed                               |  |  | One- or two-tailed P value?         | Two-tailed    |  |     |
| t, df                               | t=4.279 df=11                            |  |  | t, df                               | t=2.618 df=22 |  |     |
| Number of pairs                     | 12                                       |  |  |                                     |               |  |     |

|                                  |                 |              |         |                                |     |                                   |            |                    |              |         |                  |     |
|----------------------------------|-----------------|--------------|---------|--------------------------------|-----|-----------------------------------|------------|--------------------|--------------|---------|------------------|-----|
| <b>Supplementary Figure 5B</b>   |                 |              |         | <b>Supplementary Figure 5B</b> |     |                                   |            | y=log(y)           |              |         |                  |     |
| Kruskal-Wallis test              |                 |              |         | Ordinary One-Way ANOVA         |     |                                   |            |                    |              |         |                  |     |
| Dunn's multiple comparisons test | Mean rank diff. | Significant? | Summary | Adjusted P Value               |     | Sidak's multiple comparisons test | Mean Diff. | 95.00% CI of diff. | Significant? | Summary | Adjusted P Value |     |
| DMSO WT vs. CLEM WT              | 44.11           | Yes          | *       | 0.0336                         | A-B | DMSO WT vs. CLEM WT               | 0.3804     | 0.02332 to 0.7375  | Yes          | *       | 0.0327           | A-B |
| cmaA2 DMSO vs. cmaA2 clem        | 30.4            | No           | ns      | 0.0835                         | C-D | cmaA2 DMSO vs. cmaA2 clem         | 0.4527     | 0.1689 to 0.7366   | Yes          | ***     | 0.0005           | C-D |
| RD1 DMSO vs. RD1 CLEM            | 12.18           | No           | ns      | >0.9999                        | E-F | RD1 DMSO vs. RD1 CLEM             | 0.09292    | -0.2386 to 0.4245  | No           | ns      | 0.8757           | E-F |

|                                     |                                                                                 |  |  |                                |  |  |     |
|-------------------------------------|---------------------------------------------------------------------------------|--|--|--------------------------------|--|--|-----|
| <b>Supplementary Figure 5C</b>      |                                                                                 |  |  | <b>Supplementary Figure 5C</b> |  |  |     |
| Unpaired t test                     | unpaired because there are only two pairs and cannot test for effective pairing |  |  |                                |  |  | N/A |
| P value                             | 0.04                                                                            |  |  |                                |  |  |     |
| P value summary                     | *                                                                               |  |  |                                |  |  |     |
| Significantly different (P < 0.05)? | Yes                                                                             |  |  |                                |  |  |     |
| One- or two-tailed P value?         | Two-tailed                                                                      |  |  |                                |  |  |     |
| t, df                               | t=4.851 df=2                                                                    |  |  |                                |  |  |     |

|                                        |            |              |         |                                |     |  |  |
|----------------------------------------|------------|--------------|---------|--------------------------------|-----|--|--|
| <b>Supplementary Figure 5D</b>         |            |              |         | <b>Supplementary Figure 5D</b> |     |  |  |
| Ordinary One-Way ANOVA                 |            |              |         | N/A                            |     |  |  |
| Holm-Sidak's multiple comparisons test | Mean Diff. | Significant? | Summary | Adjusted P Value               |     |  |  |
| wt dms0 vs. WT clem                    | 0.1442     | Yes          | *       | 0.0468                         | A-B |  |  |
| wt dms0 vs. RD1 DMSO                   | 0.2869     | Yes          | ****    | <0.0001                        | A-C |  |  |
| wt dms0 vs. RD1 clem                   | 0.2431     | Yes          | ***     | 0.0002                         | A-D |  |  |
| WT clem vs. RD1 DMSO                   | 0.1428     | Yes          | *       | 0.0468                         | B-C |  |  |
| WT clem vs. RD1 clem                   | 0.09895    | No           | ns      | 0.1495                         | B-D |  |  |
| RD1 DMSO vs. RD1 clem                  | -0.04381   | No           | ns      | 0.4243                         | C-D |  |  |

|                                     |                                                    |  |  |                                     |                                          |  |     |
|-------------------------------------|----------------------------------------------------|--|--|-------------------------------------|------------------------------------------|--|-----|
| <b>Supplementary Figure 6C</b>      |                                                    |  |  | <b>Supplementary Figure 6C</b>      |                                          |  |     |
| Unpaired t test                     | pairing was ineffective, so unpaired was performed |  |  | Paired t-test                       | pairing values:<br>r=0.1413,<br>p=0.4549 |  | N/A |
| P value                             | 0.0197                                             |  |  | P value                             | 0.0606                                   |  |     |
| P value summary                     | *                                                  |  |  | P value summary                     | ns                                       |  |     |
| Significantly different (P < 0.05)? | Yes                                                |  |  | Significantly different (P < 0.05)? | No                                       |  |     |
| One- or two-tailed P value?         | Two-tailed                                         |  |  | One- or two-tailed P value?         | Two-tailed                               |  |     |
| t, df                               | t=3.764 df=4                                       |  |  | t, df                               | t=3.875 df=2                             |  |     |
|                                     |                                                    |  |  | Number of pairs                     | 3                                        |  |     |

|                                     |                |  |  |                                |  |  |     |
|-------------------------------------|----------------|--|--|--------------------------------|--|--|-----|
| <b>Supplementary Figure 6D</b>      |                |  |  | <b>Supplementary Figure 6D</b> |  |  |     |
| Unpaired t test                     |                |  |  |                                |  |  | N/A |
| P value                             | 0.4585         |  |  |                                |  |  |     |
| P value summary                     | ns             |  |  |                                |  |  |     |
| Significantly different (P < 0.05)? | No             |  |  |                                |  |  |     |
| One- or two-tailed P value?         | Two-tailed     |  |  |                                |  |  |     |
| t, df                               | t=0.7596 df=16 |  |  |                                |  |  |     |

# Supplementary Table 3

| Supplementary Figure 7A          |                 |              |         |                  |     | Supplementary Figure 7A           |                    |              |         |                  |     |
|----------------------------------|-----------------|--------------|---------|------------------|-----|-----------------------------------|--------------------|--------------|---------|------------------|-----|
| Kruskal-Wallis test              |                 |              |         |                  |     | Ordinary One-Way ANOVA            |                    |              |         |                  |     |
| Dunn's multiple comparisons test |                 |              |         |                  |     | Tukey's multiple comparisons test |                    |              |         |                  |     |
|                                  | Mean rank diff. | Significant? | Summary | Adjusted P Value |     | Mean Diff.                        | 95.00% CI of diff. | Significant? | Summary | Adjusted P Value |     |
| DMSO wt vs. CLEM wt              | 25.96           | Yes          | *       | 0.0216           | A-B | 1.543                             | 0.01631 to 3.07    | Yes          | *       | 0.0467           | A-B |
| DMSO wt vs. DMSO del             | 11.71           | No           | ns      | 0.1957           | A-C | 0.7455                            | -0.1928 to 1.684   | No           | ns      | 0.1635           | A-C |
| DMSO wt vs. CLEM del             | 18.4            | Yes          | **      | 0.0084           | A-D | 0.7654                            | -0.2201 to 1.751   | No           | ns      | 0.179            | A-D |
| CLEM wt vs. DMSO del             | -14.25          | No           | ns      | 0.5891           | B-C | -0.7974                           | -2.272 to 0.6775   | No           | ns      | 0.4829           | B-C |
| CLEM wt vs. CLEM del             | -7.563          | No           | ns      | >0.9999          | B-D | -0.7776                           | -2.283 to 0.7277   | No           | ns      | 0.522            | B-D |
| DMSO del vs. CLEM del            | 6.688           | No           | ns      | >0.9999          | C-D | 0.01983                           | -0.8833 to 0.923   | No           | ns      | >0.9999          | C-D |

  

| Supplementary Figure 7B             |                                         |  |  | Supplementary Figure 7B                 |                   |  |     |
|-------------------------------------|-----------------------------------------|--|--|-----------------------------------------|-------------------|--|-----|
| Paired t test                       | pairing values:<br>r=0.7491,<br>p=0.043 |  |  | Unpaired t test with Welch's correction | Unequal variances |  | N/A |
| P value                             | 0.0339                                  |  |  | P value                                 | 0.0738            |  |     |
| P value summary                     | *                                       |  |  | P value summary                         | ns                |  |     |
| Significantly different (P < 0.05)? | Yes                                     |  |  | Significantly different (P < 0.05)?     | No                |  |     |
| One- or two-tailed P value?         | Two-tailed                              |  |  | One- or two-tailed P value?             | Two-tailed        |  |     |
| t, df                               | t=2.897 df=5                            |  |  | Welch-corrected t, df                   | t=2.157 df=6.076  |  |     |
| Number of pairs                     | 6                                       |  |  |                                         |                   |  |     |

  

| Supplementary Figure 8B             |                                         |  |  | Supplementary Figure 8B             |               |  |     |
|-------------------------------------|-----------------------------------------|--|--|-------------------------------------|---------------|--|-----|
| Paired t test                       | pairing values:<br>r=0.8872,<br>p=0.056 |  |  | Unpaired t test                     |               |  | N/A |
| P value                             | 0.0075                                  |  |  | P value                             | 0.0564        |  |     |
| P value summary                     | **                                      |  |  | P value summary                     | ns            |  |     |
| Significantly different (P < 0.05)? | Yes                                     |  |  | Significantly different (P < 0.05)? | No            |  |     |
| One- or two-tailed P value?         | Two-tailed                              |  |  | One- or two-tailed P value?         | Two-tailed    |  |     |
| t, df                               | t=6.456 df=3                            |  |  | t, df                               | t=2.157 df=10 |  |     |
| Number of pairs                     | 4                                       |  |  |                                     |               |  |     |

  

| Supplementary Figure 8C             |                                                        |  |  | Supplementary Figure 8C             |                                          |  |  |
|-------------------------------------|--------------------------------------------------------|--|--|-------------------------------------|------------------------------------------|--|--|
| Unpaired t test                     | pairing was ineffective, unpaired t-test was performed |  |  | Paired t test                       | pairing values:<br>r=0.6598,<br>p=0.1701 |  |  |
| P value                             | 0.8566                                                 |  |  | P value                             | 0.7853                                   |  |  |
| P value summary                     | ns                                                     |  |  | P value summary                     | ns                                       |  |  |
| Significantly different (P < 0.05)? | No                                                     |  |  | Significantly different (P < 0.05)? | No                                       |  |  |
| One- or two-tailed P value?         | Two-tailed                                             |  |  | One- or two-tailed P value?         | Two-tailed                               |  |  |
| t, df                               | t=0.1886 df=6                                          |  |  | t, df                               | t=0.2978 df=3                            |  |  |
|                                     |                                                        |  |  | Number of pairs                     | 4                                        |  |  |

  

| Supplementary Figure 8C             |                                                          |  |  | Supplementary Figure 8C             |                                       |  |  |
|-------------------------------------|----------------------------------------------------------|--|--|-------------------------------------|---------------------------------------|--|--|
| Unpaired t test                     | pairing was ineffective so unpaired t-test was performed |  |  | Paired t test                       | pairing values:<br>r=0.6835, p=-.1583 |  |  |
| P value                             | 0.8875                                                   |  |  | P value                             | 0.8262                                |  |  |
| P value summary                     | ns                                                       |  |  | P value summary                     | ns                                    |  |  |
| Significantly different (P < 0.05)? | No                                                       |  |  | Significantly different (P < 0.05)? | No                                    |  |  |
| One- or two-tailed P value?         | Two-tailed                                               |  |  | One- or two-tailed P value?         | Two-tailed                            |  |  |
| t, df                               | t=0.1476 df=6                                            |  |  | t, df                               | t=0.2394 df=3                         |  |  |
|                                     |                                                          |  |  | Number of pairs                     | 4                                     |  |  |

  

| Supplementary Figure 9C           |            |                    |              |         |                  | Supplementary Figure 9C |  |  |  |  |  |
|-----------------------------------|------------|--------------------|--------------|---------|------------------|-------------------------|--|--|--|--|--|
| Repeated measures ANOVA summary   |            |                    |              |         |                  | N/A                     |  |  |  |  |  |
| Tukey's multiple comparisons test |            |                    |              |         |                  | N/A                     |  |  |  |  |  |
|                                   | Mean Diff. | 95.00% CI of diff. | Significant? | Summary | Adjusted P Value |                         |  |  |  |  |  |
| CLEM vs. MOX                      | -0.05336   | -0.3689 to 0.2622  | No           | ns      | 0.647            | A-B                     |  |  |  |  |  |
| CLEM vs. MOX+Clem                 | 0.0724     | -0.1554 to 0.3002  | No           | ns      | 0.342            | A-C                     |  |  |  |  |  |
| MOX vs. MOX+Clem                  | 0.1258     | 0.01737 to 0.2341  | Yes          | *       | 0.0376           | B-C                     |  |  |  |  |  |
